# Supplementary material for: Prospects of Cationic Carbosilane Dendronized Gold Nanoparticles as Non-viral Vectors for Delivery of Anticancer siRNAs siBCL-xL and siMCL-1
Source: MDPI journal article supplement (doi:10.3390/pharmaceutics13101549), 2021-09-24
Supplement: s1 [file s1]

## Supporting information

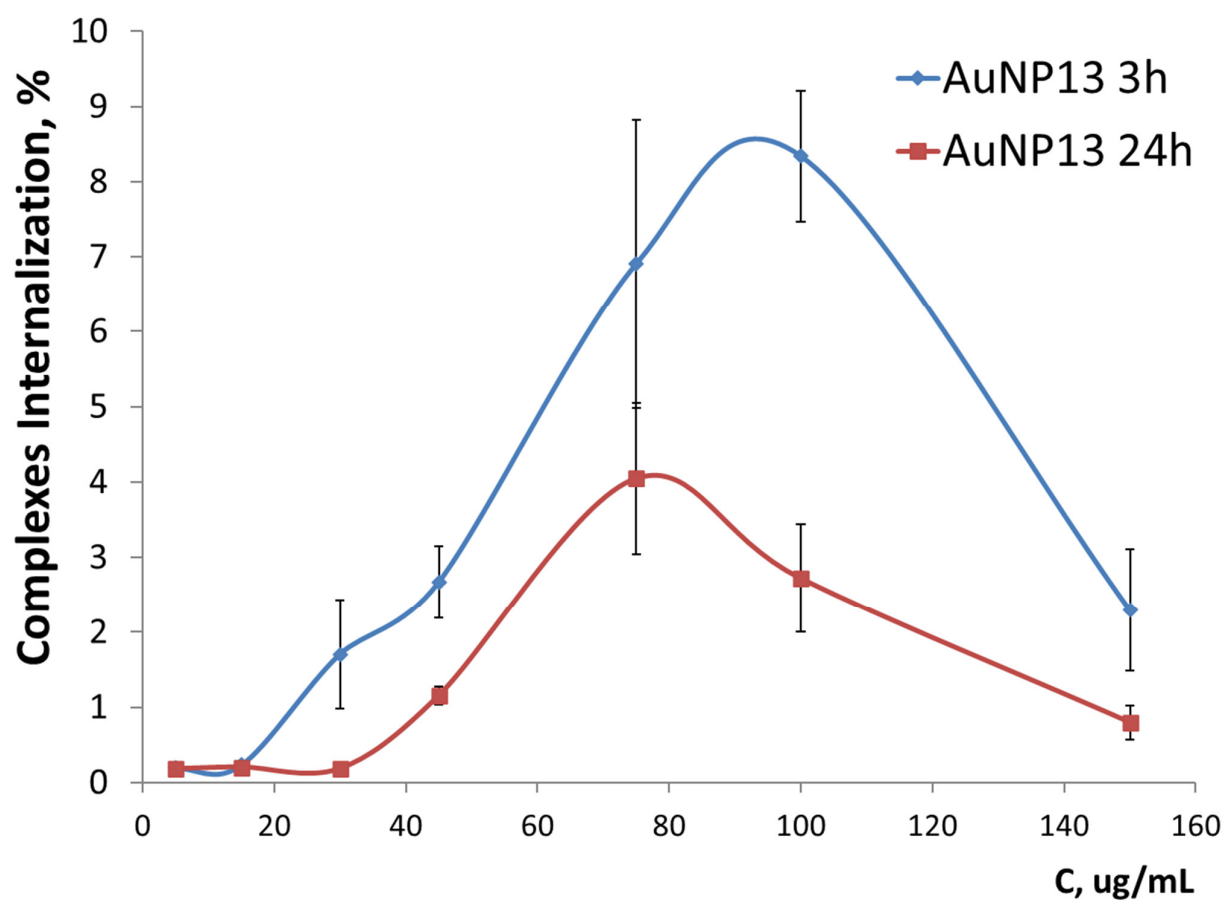

**Figure S1.** Cellular uptake of complexes with AuNP13 and siRNA (rndRNA-FAM, 100 nM) in HeLa cells after 3 and 24 h incubation. Data obtained based on fluorescence intensity from FAM-labeled RNA by flow cytometry.

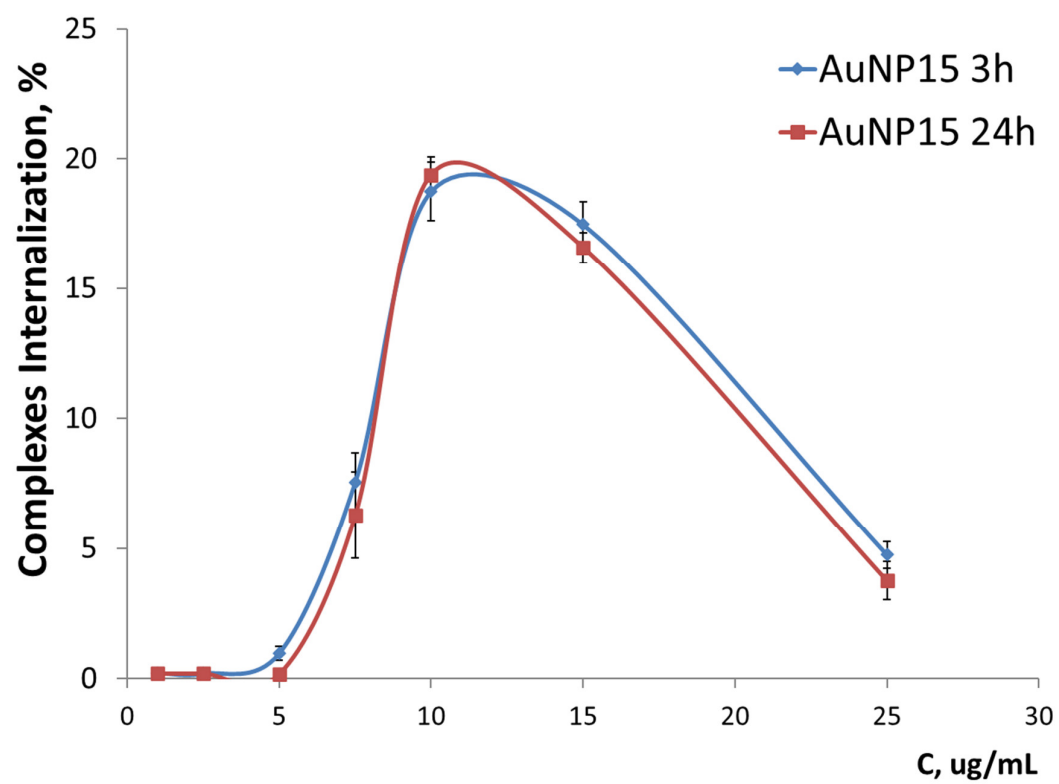

**Figure S2.** Cellular uptake of complexes with AuNP15 and siRNA (rndRNA-FAM, 100 nM) in HeLa cells after 3 and 24 h incubation. Data obtained based on fluorescence intensity from FAM-labeled RNA by flow cytometry.

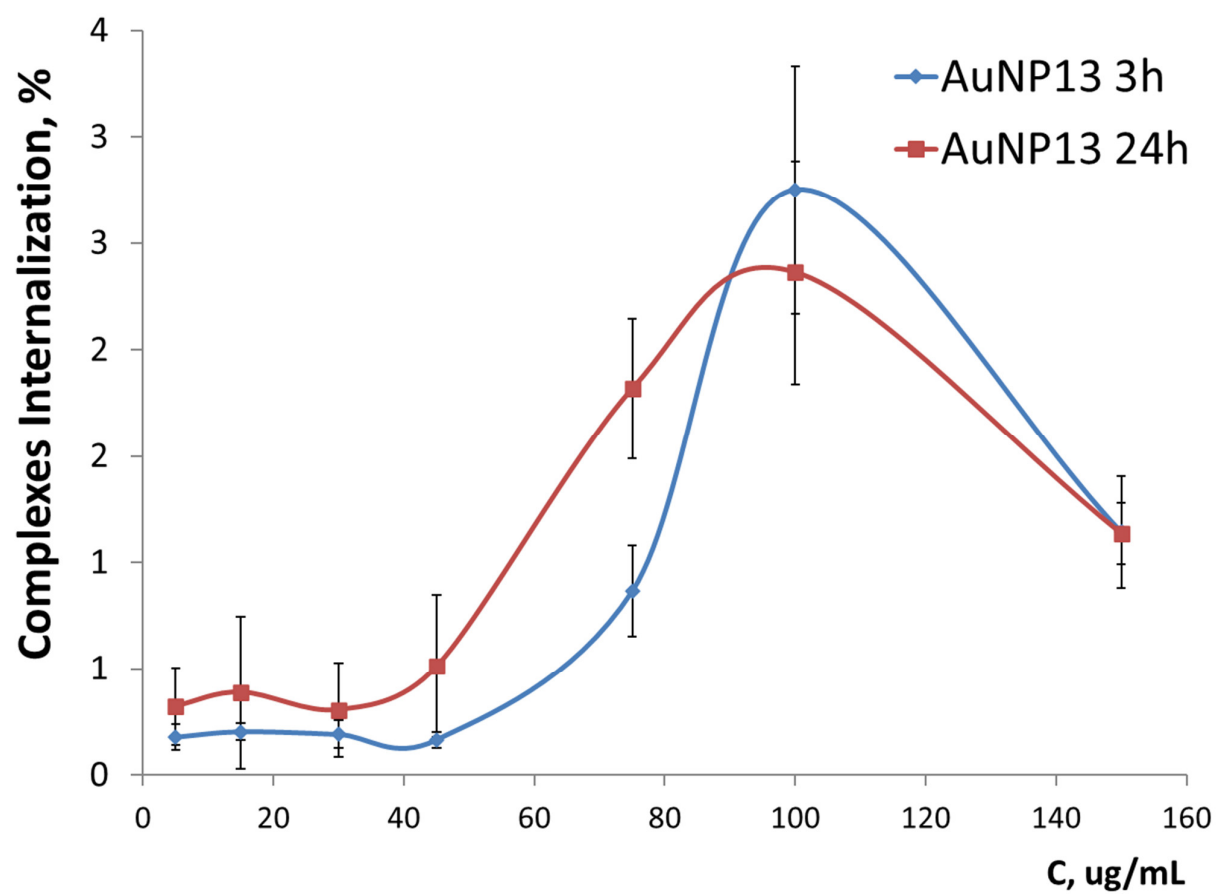

**Figure S3.** Cellular uptake of complexes with AuNP13 and siRNA (rndRNA-FAM, 100 nM) in HL-60 cells after 3 and 24 h incubation. Data obtained based on fluorescence intensity from FAM-labeled RNA by flow cytometry.

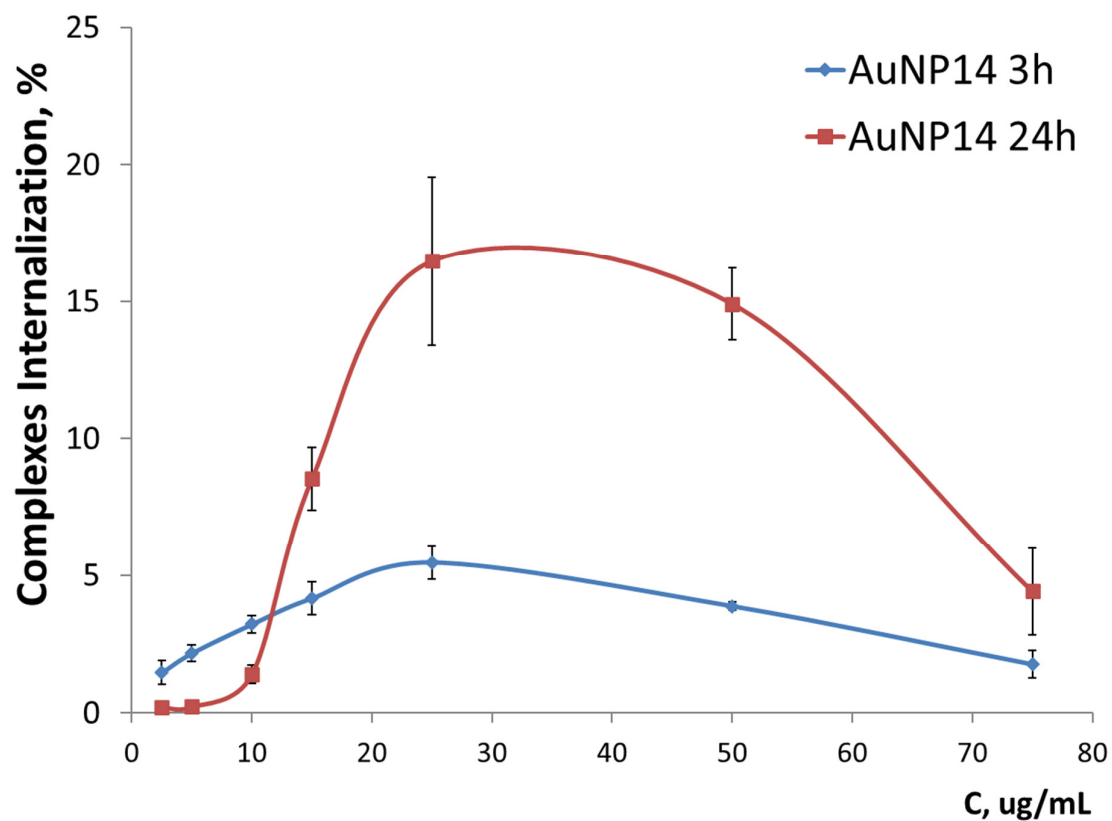

**Figure S4.** Cellular uptake of complexes with AuNP14 and siRNA (rndRNA-FAM, 100 nM) in HL-60 cells after 3 and 24 h incubation. Data obtained based on fluorescence intensity from FAM-labeled RNA by flow cytometry.

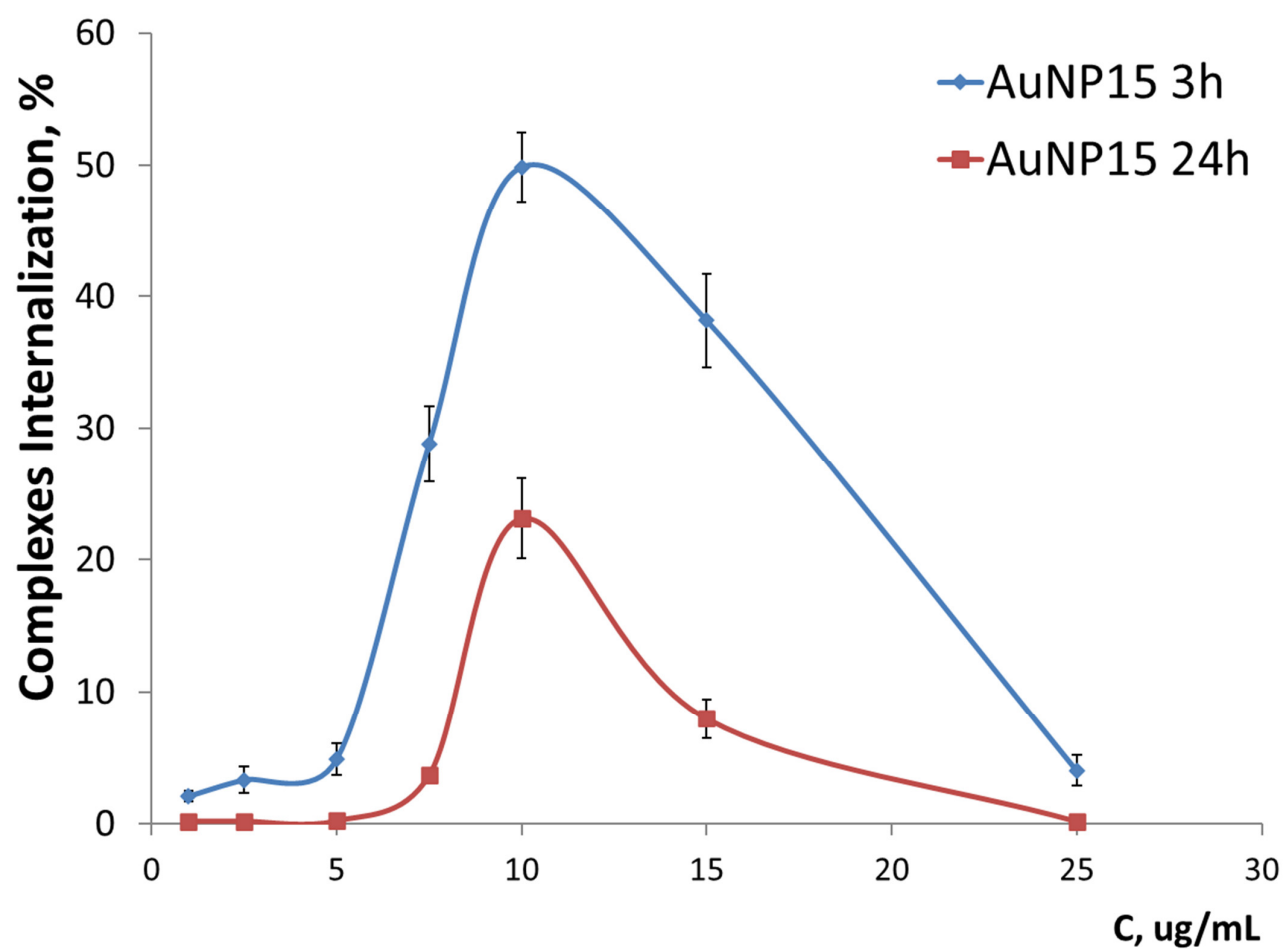

**Figure S5.** Cellular uptake of complexes with AuNP15 and siRNA (rndRNA-FAM, 100 nM) in HL-60 cells after 3 and 24 h incubation. Data obtained based on fluorescence intensity from FAM-labeled RNA by flow cytometry.

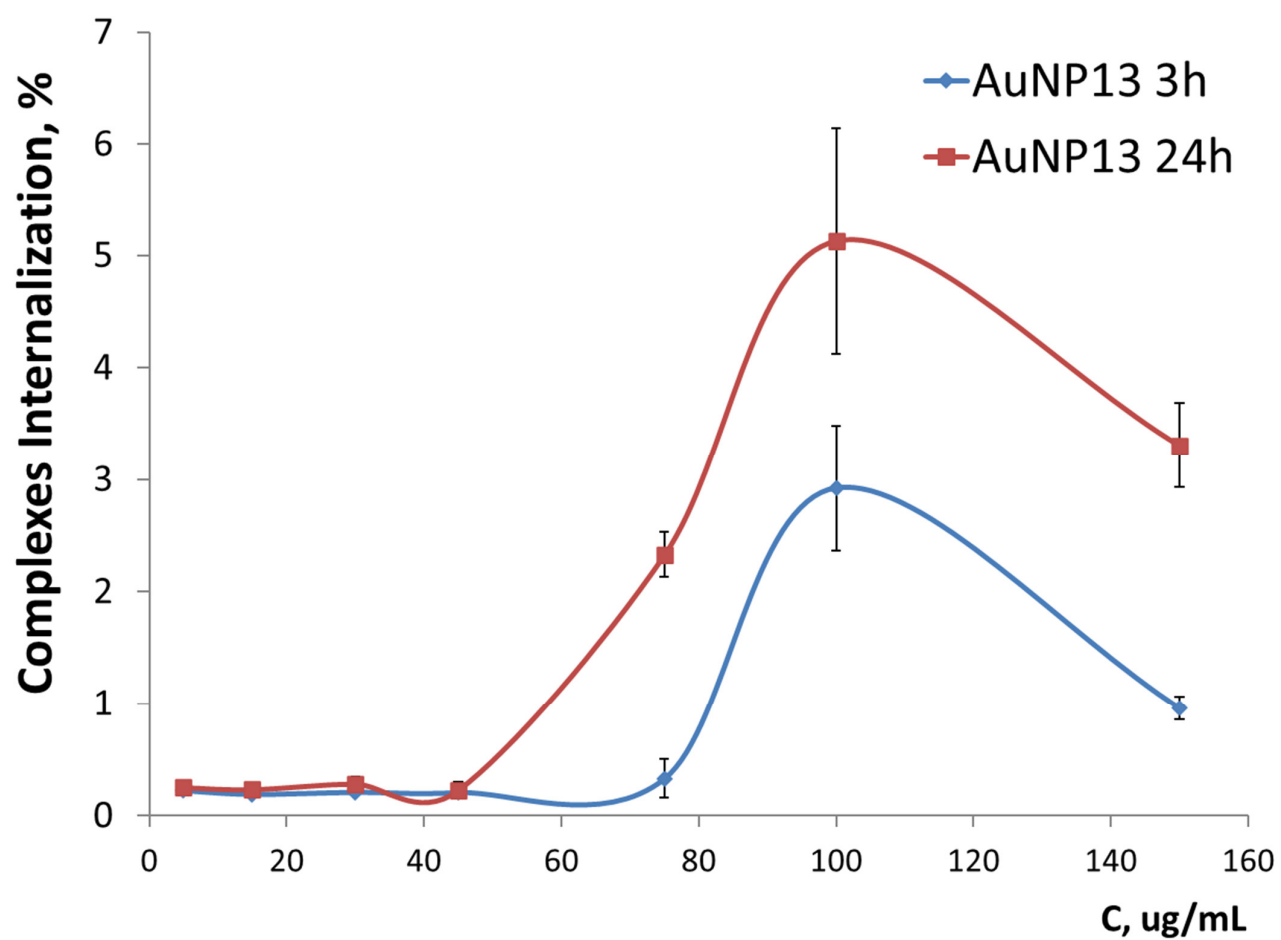

**Figure S6.** Cellular uptake of complexes with AuNP13 and siRNA (rndRNA-FAM, 100 nM) in CEM-SS cells after 3 and 24 h incubation. Data obtained based on fluorescence intensity from FAM-labeled RNA by flow cytometry.

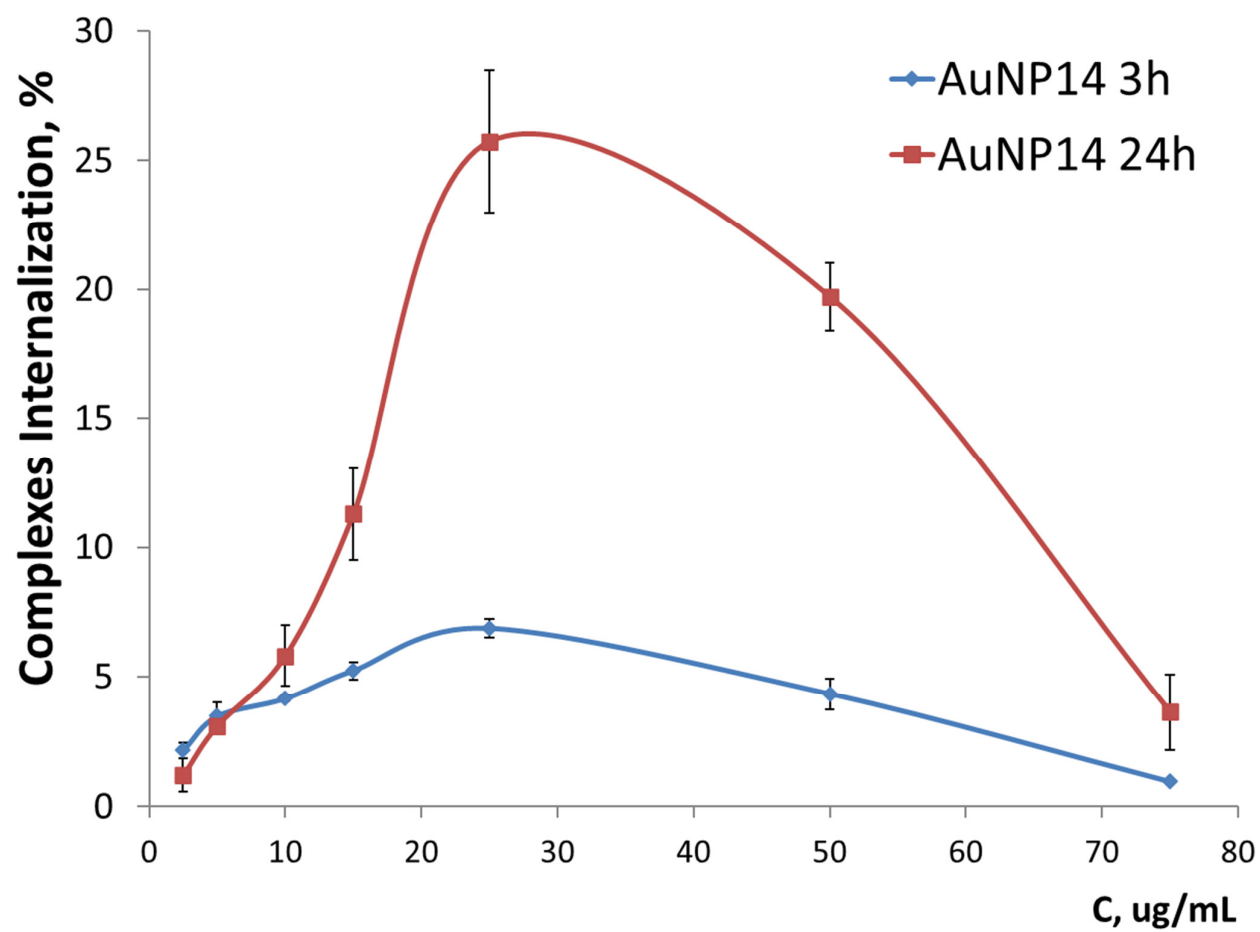

**Figure S7.** Cellular uptake of complexes with AuNP14 and siRNA (rndRNA-FAM, 100 nM) in CEM-SS cells after 3 and 24 h incubation. Data obtained based on fluorescence intensity from FAM-labeled RNA by flow cytometry.

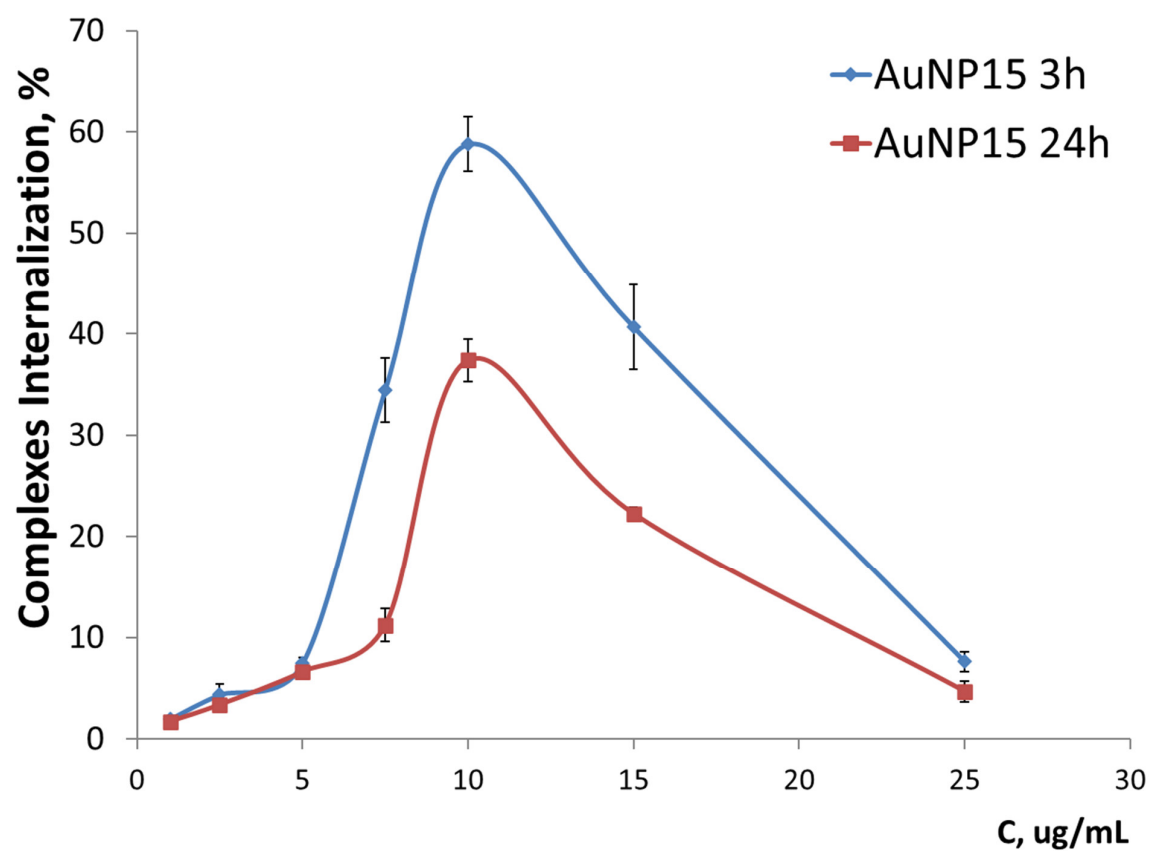

**Figure S8.** Cellular uptake of complexes with AuNP15 and siRNA (rndRNA-FAM, 100 nM) in CEM-SS cells after 3 and 24 h incubation. Data obtained based on fluorescence intensity from FAM-labeled RNA by flow cytometry.
